# Supplementary material
Source: HighWire-hosted journal article supplement (https://bmjopen.bmj.com/content/12/9/e061605)
Supplement: inline-supplementary-material-2 [file inline-supplementary-material-2.pdf]

## Incidence and prevalence of type 1 diabetes in Africa: a systematic review and meta-analysis

| Search | Search terms                                                                                                                                                                                                                                                                                                                                                                                                                                                                                                                                                                                                                                                                                                                                                                                                                                                                                                                                                                                                                                                                                                                                                                      |
|--------|-----------------------------------------------------------------------------------------------------------------------------------------------------------------------------------------------------------------------------------------------------------------------------------------------------------------------------------------------------------------------------------------------------------------------------------------------------------------------------------------------------------------------------------------------------------------------------------------------------------------------------------------------------------------------------------------------------------------------------------------------------------------------------------------------------------------------------------------------------------------------------------------------------------------------------------------------------------------------------------------------------------------------------------------------------------------------------------------------------------------------------------------------------------------------------------|
| #1     | “type 1 diabetes” OR “type 1 diabetes mellitus” OR “juvenile diabetes” OR “juvenile diabetes mellitus” OR “insulin dependent diabetes mellitus” or “insulin-dependent diabetes mellitus” OR “early-onset diabetes mellitus” OR “young-onset diabetes mellitus” OR “childhood diabetes”                                                                                                                                                                                                                                                                                                                                                                                                                                                                                                                                                                                                                                                                                                                                                                                                                                                                                            |
| #2     | Africa* OR Angola OR Benin OR Botswana OR "Burkina Faso" OR Burundi OR "Cabo Verde" OR Cameroon OR "Canary Islands" OR "Central African Republic" OR Chad OR Comoros OR Congo OR "Democratic Republic of the Congo" OR Djibouti OR "Equatorial Guinea" OR Eritrea OR Eswatini OR Ethiopia OR Gabon OR Gambia OR Ghana OR Guinea OR "Guinea Bissau" OR "Ivory Coast" OR "Cote d'Ivoire" OR Kenya OR Lesotho OR Liberia OR Madagascar OR Malawi OR Mali OR Mauritania OR Mauritius OR Mayotte OR Mozambique OR Namibia OR Niger OR Nigeria OR Réunion OR Rwanda OR "Sao Tome and Principe" OR Senegal OR Seychelles OR "Sierra Leone" OR Somalia OR "South Africa" OR “South Sudan” OR "Saint Helena" OR Togo OR Uganda OR “United Republic of Tanzania” OR Zambia OR Zimbabwe OR "Eastern Africa" OR “Middle Africa” OR "Southern Africa" OR "Western Africa" OR "East Africa" OR "East African" OR "Eastern Africa" OR "South African" OR "Southern African" OR "West Africa" OR "West African" OR "Western African" OR "Central Africa" OR "Central African" OR "Western Sahara" OR "sub Saharan Africa" OR "sub Saharan African" OR "subSaharan Africa" OR "subSaharan African" |
| #3     | Incidence* OR Prevalence*                                                                                                                                                                                                                                                                                                                                                                                                                                                                                                                                                                                                                                                                                                                                                                                                                                                                                                                                                                                                                                                                                                                                                         |
| #4     | #1 AND #2 AND #3                                                                                                                                                                                                                                                                                                                                                                                                                                                                                                                                                                                                                                                                                                                                                                                                                                                                                                                                                                                                                                                                                                                                                                  |
| #5     | #Limit [1980/01/01 to 2021/12/31                                                                                                                                                                                                                                                                                                                                                                                                                                                                                                                                                                                                                                                                                                                                                                                                                                                                                                                                                                                                                                                                                                                                                  |

**Table 1: Search Strategy for PubMed**

## Search strategy for Embase (Excerpta Medica)

| Search | Search terms                                                                                                                                                                                                                                                                                                                                                                                                                                                                                                                                                                                                                                                                                                                                                                                                                                                                                                                                                                                                                                                                                                                                                 |
|--------|--------------------------------------------------------------------------------------------------------------------------------------------------------------------------------------------------------------------------------------------------------------------------------------------------------------------------------------------------------------------------------------------------------------------------------------------------------------------------------------------------------------------------------------------------------------------------------------------------------------------------------------------------------------------------------------------------------------------------------------------------------------------------------------------------------------------------------------------------------------------------------------------------------------------------------------------------------------------------------------------------------------------------------------------------------------------------------------------------------------------------------------------------------------|
| #1     | 'type 1 diabetes'/exp OR 'type 1 diabetes' OR 'type 1 diabetes mellitus'/exp OR 'type 1 diabetes mellitus' OR 'juvenile diabetes'/exp OR 'juvenile diabetes' OR 'juvenile diabetes mellitus'/exp OR 'juvenile diabetes mellitus' OR 'insulin dependent diabetes mellitus'/exp OR 'insulin dependent diabetes mellitus' OR 'insulin-dependent diabetes mellitus'/exp OR 'insulin-dependent diabetes mellitus' OR 'early-onset diabetes mellitus'/exp OR 'early-onset diabetes mellitus' OR 'young-onset diabetes mellitus' OR 'childhood diabetes'                                                                                                                                                                                                                                                                                                                                                                                                                                                                                                                                                                                                            |
| #2     | africa* OR angola OR benin OR botswana OR 'burkina faso' OR burundi OR 'cabo verde' OR cameroon OR 'canary islands' OR 'central african republic' OR chad OR comoros OR congo OR 'democratic republic of the congo' OR djibouti OR 'equatorial guinea' OR eritrea OR eswatini OR ethiopia OR gabon OR gambia OR ghana OR guinea OR 'guinea bissau' OR 'ivory coast' OR 'cote ivoire' OR kenya OR lesotho OR liberia OR madagascar OR malawi OR mali OR mauritania OR mauritius OR mayotte OR mozambique OR namibia OR niger OR nigeria OR réunion OR rwanada OR 'sao tome and principe' OR senegal OR seychelles OR 'sierra leone' OR somalia OR 'south africa' OR 'south sudan' OR 'saint helena' OR togo OR uganda OR 'united republic of tanzania' OR zambia OR zimbabwe OR 'middle africa' OR 'southern africa' OR 'western africa' OR 'east africa' OR 'east african' OR 'eastern africa' OR 'south african' OR 'southern african' OR 'west africa' OR 'west african' OR 'western african' OR 'central africa' OR 'central african' OR 'western sahara' OR 'sub saharan africa' OR 'sub saharan african' OR 'subsaharan africa' OR 'subsaharan african' |
| #3     | incidence* OR prevalence*                                                                                                                                                                                                                                                                                                                                                                                                                                                                                                                                                                                                                                                                                                                                                                                                                                                                                                                                                                                                                                                                                                                                    |
| #4     | #1 AND #2 AND #3                                                                                                                                                                                                                                                                                                                                                                                                                                                                                                                                                                                                                                                                                                                                                                                                                                                                                                                                                                                                                                                                                                                                             |
| #5     | #1 AND #2 AND #3 AND [1980-2021]/py                                                                                                                                                                                                                                                                                                                                                                                                                                                                                                                                                                                                                                                                                                                                                                                                                                                                                                                                                                                                                                                                                                                          |

## Search strategy of Web of Science

| Search | Search terms                                                                                                                                                                                                                                                                                                                                                                                                                                                                                                                                                                                                                                                                                                                                                                                                                                                                                                                                                                                                                                                                            |
|--------|-----------------------------------------------------------------------------------------------------------------------------------------------------------------------------------------------------------------------------------------------------------------------------------------------------------------------------------------------------------------------------------------------------------------------------------------------------------------------------------------------------------------------------------------------------------------------------------------------------------------------------------------------------------------------------------------------------------------------------------------------------------------------------------------------------------------------------------------------------------------------------------------------------------------------------------------------------------------------------------------------------------------------------------------------------------------------------------------|
| #1     | (type 1 diabetes OR juvenile diabetes OR insulin dependent diabetes mellitus OR insulin-dependent diabetes mellitus OR early-onset diabetes mellitus OR young-onset diabetes mellitus OR childhood diabetes)                                                                                                                                                                                                                                                                                                                                                                                                                                                                                                                                                                                                                                                                                                                                                                                                                                                                            |
| #2     | africa* OR angola OR benin OR botswana OR burkina faso OR burundi OR cape verde OR cameroon OR central african republic OR chad OR comoros OR congo OR democratic republic of the congo OR djibouti OR equatorial guinea OR eritrea OR eswatini OR ethiopia OR gabon OR gambia OR ghana OR guinea OR guinea bissau OR ivory coast OR cote ivoire OR kenya OR lesotho OR liberia OR madagascar OR malawi OR mali OR mauritania OR mauritius OR mayotte OR mozambique OR namibia OR niger OR nigeria OR réunion OR rwanda OR sao tome and principe OR senegal OR seychelles OR sierra leone OR somalia OR south africa OR south sudan OR saint helena OR togo OR uganda OR united republic of tanzania OR zambia OR zimbabwe OR middle africa OR southern africa OR western africa OR east africa OR east african OR eastern africa OR south african OR southern african OR west africa OR west african OR western african OR central africa OR central african OR western sahara OR sub saharan africa OR sub saharan african OR subsaharan africa OR subsaharan African OR north africa |
| #3     | incidence OR prevalence OR epidemiology                                                                                                                                                                                                                                                                                                                                                                                                                                                                                                                                                                                                                                                                                                                                                                                                                                                                                                                                                                                                                                                 |
| #4     | #1 AND #2 AND #3                                                                                                                                                                                                                                                                                                                                                                                                                                                                                                                                                                                                                                                                                                                                                                                                                                                                                                                                                                                                                                                                        |
| #5     | #1 AND #2 AND #3 AND [1980-2021]/py                                                                                                                                                                                                                                                                                                                                                                                                                                                                                                                                                                                                                                                                                                                                                                                                                                                                                                                                                                                                                                                     |

## Search strategy of AJOL

| Search | Search terms                                                                                                                                                                                                                                                                                                                                                                                                                                                                                                                                                                                                                                                                                                                                                                                                                                                                                                                                                                                                                                                             |
|--------|--------------------------------------------------------------------------------------------------------------------------------------------------------------------------------------------------------------------------------------------------------------------------------------------------------------------------------------------------------------------------------------------------------------------------------------------------------------------------------------------------------------------------------------------------------------------------------------------------------------------------------------------------------------------------------------------------------------------------------------------------------------------------------------------------------------------------------------------------------------------------------------------------------------------------------------------------------------------------------------------------------------------------------------------------------------------------|
| #1     | (type 1 diabetes OR type 1 diabetes mellitus OR juvenile diabetes OR juvenile diabetes mellitus OR insulin-dependent diabetes mellitus OR insulin dependent diabetes mellitus OR early-onset diabetes OR early-onset diabetes mellitus OR young-onset diabetes OR childhood diabetes)                                                                                                                                                                                                                                                                                                                                                                                                                                                                                                                                                                                                                                                                                                                                                                                    |
| #2     | africa* OR angola OR benin OR botswana OR 'burkina faso OR burundi OR cape verde OR cameroon OR central african republic OR chad OR comoros OR congo OR democratic republic of the congo OR djibouti OR equatorial guinea OR eritrea OR eswatini OR ethiopia OR gabon OR gambia OR ghana OR guinea OR guinea bissau OR ivory coast OR cote ivoire OR kenya OR lesotho OR liberia OR madagascar OR malawi OR mali OR mauritania OR mauritius OR mayotte OR mozambique OR namibia OR niger OR nigeria OR réunion OR rwanda OR sao tome and principe OR senegal OR seychelles OR sierra leone OR somalia OR south africa OR south sudan OR togo OR uganda OR united republic of tanzania OR zambia OR zimbabwe OR middle africa OR southern africa OR western africa OR east africa OR east african OR eastern africa OR south african OR southern african OR west africa OR west african OR western african OR central africa OR central african OR western sahara OR sub-saharan africa OR sub saharan african OR subsaharan africa OR subsaharan African OR north africa |
| #3     | incidence OR prevalence OR epidemiology                                                                                                                                                                                                                                                                                                                                                                                                                                                                                                                                                                                                                                                                                                                                                                                                                                                                                                                                                                                                                                  |
| #4     | #1 AND #2 AND #3                                                                                                                                                                                                                                                                                                                                                                                                                                                                                                                                                                                                                                                                                                                                                                                                                                                                                                                                                                                                                                                         |
| #5     | #1 AND #2 AND #3 AND [1980-2021]/py                                                                                                                                                                                                                                                                                                                                                                                                                                                                                                                                                                                                                                                                                                                                                                                                                                                                                                                                                                                                                                      |
